# Supplementary material for: TLR7 deficiency enhances inflammation in the URT but reduces LRT immunity following influenza A infection
Source: Springer Nature journal article supplement (doi:10.1038/s41598-025-04154-6), 2025-05-29
Supplement: MOESM1 [file 41598_2025_4154_MOESM1_ESM.pdf]

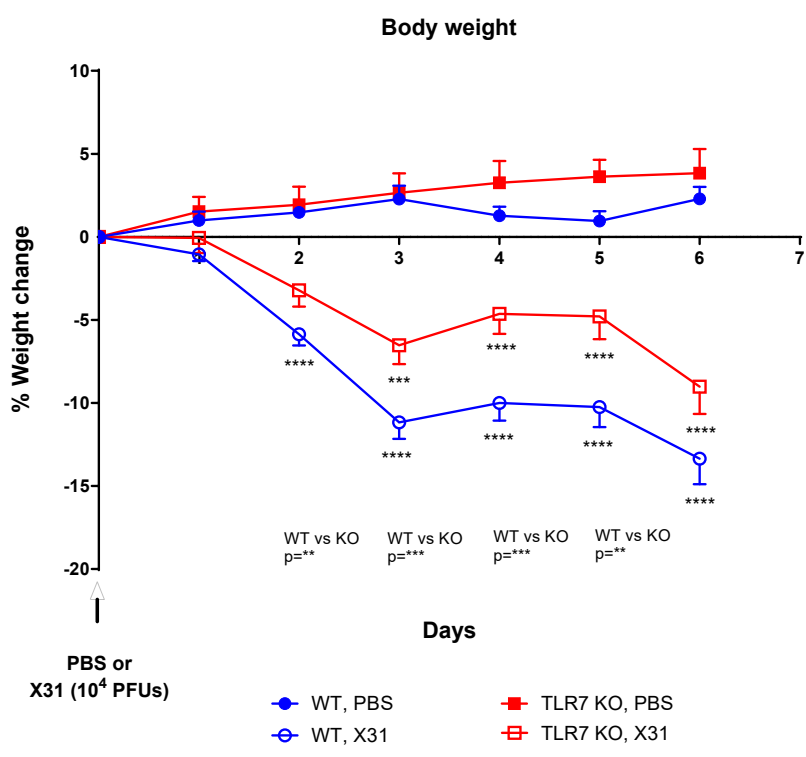

**Supplementary Figure 1. TLR7 KO mice exhibit reduced acute body weight loss following X31 infection.** WT C57Bl/6 or TLR7 KO mice were infected with Hk-X31 ( $10^4$  PFUs) or PBS (control). Body weights were recorded daily for 6 days and presented as % weight change from day of infection. Data is expressed as mean  $\pm$  SEM, n = 9-13. Statistical analysis was conducted using two-way ANOVA test followed by Tukey's post hoc test for multiple comparisons (\*\* $p < 0.01$ , \*\*\* $p < 0.001$ , \*\*\*\* $p < 0.0001$ ).
